# Supplementary material for: Excessive pursuit of total resection is unnecessary for postoperative seizure control in oligodendroglioma
Source: Research Square preprint supplement (doi:10.21203/rs.3.rs-8523865/v1), 2026-01-20
Supplement: Supplementary file 1 [file e37efb55ac2ab49bc71db40a.docx]

**Supplementary Materials**

**Part 1. Independent factors for preoperative GRE**

***Independent factors for preoperative GRE in all patients***

In the univariate analysis, the factors for preoperative GRE control entered multivariate analysis, which included age (Odds ratio (OR): 0.947; 95% CI: 0.936–0.958; *p* < 0.001), IDH mutation (OR: 4.165; 95% CI: 3.185–5.446; *p* < 0.001), chromosome 1p/19q codeletion (OR: 3.007; 95% CI: 2.303–3.926; *p* < 0.001), patient with headache (OR: 0.121; 95% CI: 0.090–0.161; *p* < 0.001), patient with neurological symptoms (OR: 0.235; 95% CI: 0.169–0.325; *p* < 0.001), glioma located in frontal lobe (OR: 2.403; 95% CI: 1.839–3.140; *p* < 0.001), glioma located in insula lobe (OR: 1.588; 95% CI: 1.179–2.138; *p* = 0.002), glioma located in parietal lobe (OR: 0.649; 95% CI: 0.470–0.897; *p* = 0.009), and glioma located in occipital lobe (OR: 0.332; 95% CI: 0.193–0.570; *p* < 0.001).

In the multivariate analysis, the age (OR: 0.970; 95% CI: 0.956–0.985; *p* < 0.001), patient with headache (OR: 0.078; 95% CI: 0.054–0.111; *p* < 0.001) and patient with neurological symptoms (OR: 0.138; 95% CI: 0.091–0.212; *p* < 0.001) were independent favorable factors for preoperative GRE occurrence.

***Independent factors for preoperative GRE in patients with IDH mutation***

In the univariate analysis, the factors for preoperative GRE control entered multivariate analysis, which included male sex (OR: 1.491; 95% CI: 1.065–2.087; *p* = 0.020),age (OR: 0.961; 95% CI: 0.944–0.977; *p* < 0.001), chromosome 1p/19q codeletion (OR: 1.335; 95% CI: 0.952–1.873; *p* = 0.094), patient with headache (OR: 0.108; 95% CI: 0.073–0.161; *p* < 0.001), patient with neurological symptoms (OR: 0.205; 95% CI: 0.124–0.339; *p* < 0.001), and glioma located in frontal lobe (OR:1.420; 95% CI: 0.948–2.217; *p* = 0.089).

In the multivariate analysis, the age (OR: 0.971; 95% CI: 0.950–0.992; *p* = 0.006), patient with headache (OR: 0.128; 95% CI: 0.072–0.228; *p* < 0.001) and patient with neurological symptoms (OR: 0.081; 95% CI: 0.052–0.127; *p* < 0.001) were independent favorable factors for preoperative GRE occurrence.

***Independent factors for preoperative GRE in patients with IDH wild-type***

In the univariate analysis, the factors for preoperative GRE control entered multivariate analysis, which included age (OR: 0.966; 95% CI: 0.949–0.983; *p* < 0.001), patient with headache (OR: 0.196; 95% CI: 0.124–0.308; *p* < 0.001), patient with neurological symptoms (OR: 0.458; 95% CI: 0.289–0.725; *p* = 0.001).

In the multivariate analysis, the age (OR: 0.969; 95% CI: 0.949–0.989; *p* = 0.003), patient with headache (OR: 0.072; 95% CI: 0.039–0.133; *p* < 0.001), and patient with neurological symptoms (OR: 0.151; 95% CI: 0.080–0.283; *p* < 0.001) were independent favorable factors for preoperative GRE occurrence.

**Part 2. Supplementary Tables**

| **Table s1. Engel classification** | |
| --- | --- |
| Class I | Free from disabling seizures |
| Class II | Rare disabling seizures (almost seizure free) |
| Class III | Worthwhile improvement |
| Class IV | No worthwhile improvement |

| **Table s2. Results of multi-groups mutual comparison with Bonferroni correction** | | | | | | |
| --- | --- | --- | --- | --- | --- | --- |
| **Characteristic** | **Astrocytoma** | | | Group-astrocytoma vs Group-oligodendroglioma | Group-astrocytoma vs Group-GBM | Group-oligodendroglioma vs Group-GBM |
| Grade 2 vs Grade 3 | Grade 2 vs Grade 4 | Grade 3 vs Grade 4 |
| Sex a | 0.640 | 0.735 | > 0.999 | 0.794 | 0.516 | 0.670 |
| Age | > 0.999 | 0.081 | 0.245 | 0.134 | < 0.001 | < 0.001 |
| Extent of resection | > 0.999 | > 0.999 | > 0.999 | 0.035 | > 0.999 | 0.007 |
| Preoperative Headache a | 0.114 | 0.004 | 0.207 | 0.003 | < 0.001 | < 0.001 |
| Preoperative Neurological symptoms a | 0.825 | 0.003 | 0.003 | 0.366 | < 0.001 | < 0.001 |
| Preoperative GRE a | 0.434 | 0.001 | 0.027 | 0.085 | < 0.001 | < 0.001 |
| Newly post-GRE a | 0.577 | 0.617 | 0.259 | 0.647 | 0.018 | 0.059 |
| Engel’s class distribution a | 0.932 | 0.048 | 0.083 | 0.233 | < 0.001 | < 0.001 |
| *When p value of the item with label ‘a’ was lower than 0.017 (0.05/3), the results of comparison was significant. | | | | | | |

| **Table s3. Independent factors of postoperative GRE onset in all patient** | | | | | | | | |
| --- | --- | --- | --- | --- | --- | --- | --- | --- |
| **Demographic and clinical characteristics** | **Univariate analysis** | | | | **Multivariate analysis** | | | |
| *p* value | Odds Ratio | Lower 95% CI | Upper 95% CI | *p* value | Odds Ratio | Lower 95% CI | Upper 95% CI |
| Sex (reference: female) | 0.036 | 1.369 | 1.020 | 1.838 | - | - | - | - |
| Age | 0.007 | 0.984 | 0.972 | 0.995 | - | - | - | - |
| Preoperative GRE occurrence (reference: no GRE) | < 0.001 | 3.105 | 2.317 | 4.162 | < 0.001 | 2.579 | 1.842 | 3.610 |
| IDH status (reference: IDH wildtype) | 0.001 | 1.631 | 1.220 | 2.181 | - | - | - | - |
| Chromosome 1p/19q co-deletion (reference: intact) | < 0.001 | 1.775 | 1.322 | 2.384 | 0.015 | 1.497 | 1.083 | 2.069 |
| Preoperative headache (reference: NO) | < 0.001 | 0.472 | 0.352 | 0.633 | 0.047 | 0.706 | 0.501 | 0.995 |
| Preoperative neurological symptoms (reference: NO) | 0.293 | 0.843 | 0.613 | 1.159 | - | - | - | - |
| Extent of tumor resection | 0.006 | 0.247 | 0.090 | 0.676 | 0.001 | 0.173 | 0.059 | 0.503 |
| Located on frontal lobe (reference: NO) | 0.134 | 1.254 | 0.933 | 1.687 | - | - | - | - |
| Located on temporal lobe (reference: NO) | 0.034 | 1.362 | 1.023 | 1.814 | 0.005 | 1.556 | 1.143 | 2.119 |
| Located on insular lobe (reference: NO) | 0.090 | 1.338 | 0.956 | 1.873 | - | - | - | - |
| Located on parietal lobe (reference: NO) | 0.113 | 0.737 | 0.505 | 1.075 | - | - | - | - |
| Located on occipital lobe (reference: NO) | 0.030 | 0.512 | 0.280 | 0.937 | - | - | - | - |
| *Strategy of theMultivariate analysis was forward. GRE, glioma related epilepsy; CI, confident interval. | | | | | | | | |

| **Table s4. Independent factors of postoperative GRE onset in patient with preoperative GRE** | | | | | | | | |
| --- | --- | --- | --- | --- | --- | --- | --- | --- |
| **Demographic and clinical characteristics** | **Univariate analysis** | | | | **Multivariate analysis** | | | |
| *p* value | Odds Ratio | Lower 95% CI | Upper 95% CI | *p* value | Odds Ratio | Lower 95% CI | Upper 95% CI |
| Sex (reference: female) | 0.204 | 1.316 | 0.862 | 2.008 | - | - | - | - |
| Age | 0.429 | 1.008 | 0.989 | 1.027 | - | - | - | - |
| IDH status (reference: IDH wildtype) | 0.073 | 0.664 | 0.424 | 1.039 | - | - | - | - |
| Chromosome 1p/19q co-deletion (reference: intact) | 0.348 | 1.214 | 0.809 | 1.821 | - | - | - | - |
| Preoperative headache (reference: NO) | 0.091 | 0.633 | 0.372 | 1.075 | - | - | - | - |
| Preoperative neurological symptoms (reference: NO) | 0.258 | 1.399 | 0.782 | 2.504 | - | - | - | - |
| Extent of tumor resection | < 0.001 | 0.005 | 0.001 | 0.036 | < 0.001 | 0.006 | 0.001 | 0.044 |
| Located on frontal lobe (reference: NO) | 0.319 | 0.794 | 0.505 | 1.250 | - | - | - | - |
| Located on temporal lobe (reference: NO) | 0.004 | 1.844 | 1.218 | 2.792 | 0.018 | 1.682 | 1.091 | 2.591 |
| Located on insular lobe (reference: NO) | 0.552 | 1.149 | 0.726 | 1.819 | - | - | - | - |
| Located on parietal lobe (reference: NO) | 0.276 | 0.725 | 0.406 | 1.293 | - | - | - | - |
| Located on occipital lobe (reference: NO) | 0.631 | 1.274 | 0.474 | 3.421 | - | - | - | - |
| *Strategy of the Multivariate analysis was forward. GRE, glioma related epilepsy; CI, confident interval. | | | | | | | | |

| **Table s5. Risk factors of postoperative GRE onset in patient without preoperative GRE** | | | | | | | | |
| --- | --- | --- | --- | --- | --- | --- | --- | --- |
| **Demographic and clinical characteristics** | **Univariate analysis** | | | | **Multivariate analysis** | | | |
| *p* value | Odds Ratio | Lower 95% CI | Upper 95% CI | *p* value | Odds Ratio | Lower 95% CI | Upper 95% CI |
| Sex (reference: female) | 0.265 | 1.280 | 0.830 | 1.975 | - | - | - | - |
| Age | 0.163 | 0.988 | 0.970 | 1.005 | - | - | - | - |
| IDH status (reference: IDH wildtype) | 0.051 | 1.601 | 0.998 | 2.568 | - | - | - | - |
| Chromosome 1p/19q co-deletion (reference: intact) | 0.004 | 1.867 | 1.219 | 2.858 | 0.004 | 1.867 | 1.219 | 2.858 |
| Preoperative headache (reference: NO) | 0.412 | 0.830 | 0.533 | 1.295 | - | - | - | - |
| Preoperative neurological symptoms (reference: NO) | 0.470 | 1.171 | 0.763 | 1.799 | - | - | - | - |
| Extent of tumor resection | 0.406 | 2.036 | 0.381 | 10.884 | - | - | - | - |
| Located on frontal lobe (reference: NO) | 0.395 | 1.204 | 0.785 | 1.847 | - | - | - | - |
| Located on temporal lobe (reference: NO) | 0.501 | 1.157 | 0.756 | 1.772 | - | - | - | - |
| Located on insular lobe (reference: NO) | 0.406 | 1.251 | 0.738 | 2.120 | - | - | - | - |
| Located on parietal lobe (reference: NO) | 0.707 | 0.905 | 0.538 | 1.522 | - | - | - | - |
| Located on occipital lobe (reference: NO) | 0.061 | 0.439 | 0.186 | 1.040 | - | - | - | - |
| *Strategy of the Multivariate analysis was forward. GRE, glioma related epilepsy; CI, confident interval. | | | | | | | | |

| **Table s6. Different EOR for postoperative seizure freedom in patient with oligodendroglioma and preoperative GRE** | | | | | | |
| --- | --- | --- | --- | --- | --- | --- |
| EOR | Odds Ratio | 95% CI | | *p* value | Number of patients binarized EOR | |
| Lower | Upper | ≥ Threshold EOR | < Threshold EOR |
| 0.85 | 0.168 | 0.067 | 0.420 | < 0.001 | 161 | 28 |
| 0.86 | 0.195 | 0.089 | 0.429 | < 0.001 | 153 | 36 |
| 0.87 | 0.173 | 0.080 | 0.374 | < 0.001 | 149 | 40 |
| 0.88 | 0.191 | 0.091 | 0.402 | < 0.001 | 143 | 46 |
| 0.89 | 0.187 | 0.091 | 0.386 | < 0.001 | 140 | 49 |
| 0.90 | 0.158 | 0.078 | 0.320 | < 0.001 | 131 | 58 |
| 0.91 | 0.197 | 0.101 | 0.385 | < 0.001 | 126 | 63 |
| 0.92 | 0.249 | 0.131 | 0.473 | < 0.001 | 122 | 67 |
| 0.93 | 0.272 | 0.158 | 0.466 | < 0.001 | 118 | 71 |
| 0.94 | 0.241 | 0.127 | 0.457 | < 0.001 | 118 | 71 |
| 0.95 | 0.209 | 0.109 | 0.445 | < 0.001 | 116 | 73 |
| 0.96 | 0.209 | 0.109 | 0.449 | < 0.001 | 116 | 73 |
| 0.97 | 0.209 | 0.109 | 0.447 | < 0.001 | 116 | 73 |
| 0.98 | 0.209 | 0.109 | 0.401 | < 0.001 | 116 | 73 |
| 0.99 | 0.209 | 0.109 | 0.401 | < 0.001 | 116 | 73 |
| 1.00 | 0.209 | 0.109 | 0.401 | < 0.001 | 116 | 73 |
| * Results of EOR in Multivariable binary logistic analysis. After univariate analysis, patient with headache, with neurological symptoms, and EOR were significant and entered multivariable analysis. The number of the patients whose EOR was lower than 0.85 was 28. This sample size was lower than 30 (10 times of the number of factors entering multivariate analysis). Hence, the statistical stopped when the EOR was equal to 0,85. EOR, extent of tumor resection; GRE, glioma related epilepsy; CI, confidence interval. | | | | | | |

| **Table s7. Different EOR for postoperative seizure freedom in patient with glioblastoma and preoperative GRE** | | | | | | |
| --- | --- | --- | --- | --- | --- | --- |
| EOR | Odds ratio | 95% CI | | *p* value | Number of patients binarized EOR | |
| Lower | Upper | ≥ Threshold EOR | < Threshold EOR |
| 0.96 | 0.234 | 0.094 | 0.581 | 0.002 | 71 | 39 |
| 0.97 | 0.223 | 0.092 | 0.540 | 0.001 | 69 | 41 |
| 0.98 | 0.253 | 0.106 | 0.606 | 0.002 | 68 | 42 |
| 0.99 | 0.197 | 0.082 | 0.475 | < 0.001 | 66 | 44 |
| 1.00 | 0.197 | 0.082 | 0.475 | < 0.001 | 66 | 44 |
| *Results of EOR in Multivariable binary logistic analysis. After univariate analysis, tumor located in temporal lobe, located in insula lobe, located in parietal lobe, and EOR were significant and entered multivariable analysis. The number of the patients whose EOR was lower than 0.96 was 39. This sample size was lower than 40 (10 times of the number of factors entering multivariate analysis). Hence, the statistical stopped when the EOR was equal to 0.96. EOR, extent of tumor resection; GRE, glioma related epilepsy; CI, confidence interval. | | | | | | |
